# Supplementary material for: Thaxtomin A affects CESA-complex density, expression of cell wall genes, cell wall composition, and causes ectopic lignification in Arabidopsis thaliana seedlings
Source: PubMed Central journal article supplement — J Exp Bot. 2009 Mar;60(3):955–65. doi: 10.1093/jxb/ern344 (PMC2652064; doi:10.1093/jxb/ern344), 2009-03

# Supplementary Material to ‘Thaxtomin A affects CESA-complex density, expression of cell wall genes, cell wall composition, and causes ectopic lignification in *Arabidopsis thaliana* seedlings’

Volker Bischoff, Sarah Jane Cookson, Shuang Wu, Wolf-Rüdiger Scheible

**Table S1.** Quantitative real-time RT-PCR results and primer sequences.

| AGI       | Gene Name | Annotation                               | $\Delta C_T^*$<br>Control | $\Delta C_T^*$<br>Thax. A | $\Delta\Delta C_T^{**}$<br>Thax. A | $\Delta C_T^*$<br>Isoxaben | $\Delta\Delta C_T^{**}$<br>Isoxaben | Forward Primer             | Reverse Primer              |
|-----------|-----------|------------------------------------------|---------------------------|---------------------------|------------------------------------|----------------------------|-------------------------------------|----------------------------|-----------------------------|
| At4g32410 | CESA1     | cellulose synthase                       | 2.90                      | 4.16                      | -1.26                              | 3.64                       | -0.74                               | GAGCTGAGATGGAGCGGTGT       | CTGCTCGTTCCTCCACCAAT        |
| At4g39350 | CESA2     | cellulose synthase                       | 5.16                      | 6.65                      | -1.49                              | 6.01                       | -0.85                               | AAGCAGATTCATGCGCTAGAGA     | CAACATTTGACTGGGACGA         |
| At5g05170 | CESA3     | cellulose synthase                       | 3.03                      | 4.35                      | -1.32                              | 3.81                       | -0.78                               | GGAGTTGAAGGTGCTGGTTTTG     | CCAGGCTCATTGCGACATT         |
| At5g09870 | CESA5     | cellulose synthase                       | 4.35                      | 6.68                      | -2.33                              | 5.53                       | -1.18                               | CATCGTCCCTGAGATTAGCAACT    | AGCAATCGACCCGAAAAGTG        |
| At5g64740 | CESA6     | cellulose synthase                       | 2.72                      | 4.37                      | -1.65                              | 3.65                       | -0.93                               | GGAAAATTCATCGTCCCGAG       | AGAAGAGCGCCATGAAGAGG        |
| At5g49720 | KOR1      | membrane-bound endo-1,4-beta-D-glucanase | 2.85                      | 3.85                      | -1.00                              | 3.25                       | -0.40                               | ATGGAGGTTAATAGAGTTGAATCATG | AATATTGCAGCGGCTGTGG         |
| At3g08550 | KOB1      | plasma membrane protein                  | 5.86                      | 7.14                      | -1.28                              | 6.67                       | -0.81                               | AATTGCGTCAACAGCAACTGA      | TGTTACGGTACCAGCTTAGCA       |
| At1g67490 | KNF       | alpha-glucosidase I                      | 6.02                      | 6.96                      | -0.94                              | 6.90                       | -0.88                               | AGCAATTTGATAAGGAACGTGGTT   | GATGTACCCCGTCTCGTAATAGTTT   |
| At5g17420 | CESA7     | xylem-specific cellulose synthase        | 7.42                      | 9.86                      | -2.44                              | 11.09                      | -3.67                               | GAGCTGGGTTGGATCTATGGC      | AATGCATCTTGAATCCCGTCA       |
| At4g18780 | CESA8     | xylem-specific cellulose synthase isomer | 7.35                      | 9.99                      | -2.64                              | 11.31                      | -3.96                               | AGCTATTTGCCCTTACCAGGC      | CATGCTTGCTAGGTTTGATAGCG     |
| At5g15630 | COBL4     | member of the COBRA family               | 9.52                      | 12.20                     | -2.68                              | 13.40                      | -3.88                               | CGAGAACAAAAAGAGCTGCG       | TTCTTGTTAGAATCTTAGAATCAGCCT |
| At5g54690 | IRX8      | putative galacturonosyltransferase       | 8.92                      | 11.38                     | -2.46                              | 12.62                      | -3.70                               | TCATTGGCTTGACGAGAACTTAA    | CCCAGCTGCCACAACTCAG         |
| At2g37090 | IRX9      | putative family 43 glycosyl transferase  | 7.45                      | 10.20                     | -2.75                              | 11.52                      | -4.07                               | AAGGCACCAACAGGATTCG        | CCTCCAAACTACTTGCTTCACAT     |
| At1g02730 | CslD5     | cellulose synthase-like gene             | 5.12                      | 7.88                      | -2.76                              | 7.89                       | -2.77                               | CGAATGCACAACAGAGGATGG      | CACGGAAAGCGTCTCTTTTTTG      |
| At2g24630 | CslC8     | cellulose synthase-like gene             | 8.27                      | 10.72                     | -2.45                              | 10.51                      | -2.24                               | TAACCGTGCCACATTTCAAGG      | AACGCCACCTAGCCTGAAC         |
| At3g61130 | GAUT1     | putative galacturonosyltransferase       | 6.46                      | 7.58                      | -1.12                              | 7.38                       | -0.92                               | CCGAGTAGACCCCTCCTTT        | CATCAGGAGTTGCTGGATTCTC      |
| At2g46480 | GAUT2     | putative galacturonosyltransferase       | 13.86                     | 17.12                     | -3.26                              | 17.79                      | -3.93                               | AACCTGAACGAAAACCGGAC       | CCCTGGTGGCAATGTTCTAG        |
| At4g38270 | GAUT3     | putative galacturonosyltransferase       | 8.19                      | 8.85                      | -0.66                              | 8.61                       | -0.42                               | GATTTTGCAAGCCAGCAAA        | CCTTTCTGACGTAAAATCTGCC      |
| At5g47780 | GAUT4     | putative galacturonosyltransferase       | 6.06                      | 6.93                      | -0.87                              | 6.39                       | -0.33                               | CTGCCAAAAGACTGCTATAGAAAAGC | GGCCAGTGTGTTGCTCCATTG       |
| At2g30575 | GAUT5     | putative galacturonosyltransferase       | 7.69                      | 9.39                      | -1.70                              | 8.66                       | -0.97                               | CTTCGACCTGGGAGTAAAAGGA     | ACTGGCAATCCCTGCTT           |
| At3g25140 | GAUT8     | Quasimodo1                               | 4.10                      | 5.21                      | -1.11                              | 4.53                       | -0.43                               | TGGCAAAATCTGAACGAGAACA     | TCAGTCCCGGTGGTAACGTC        |
| At2g20810 | GAUT10    | putative galacturonosyltransferase       | 6.85                      | 8.11                      | -1.26                              | 7.76                       | -0.91                               | TCATTCTCTCAAAGCTGGTCAT     | CGGTAACGTCGCTTAGGAATAGA     |
| At1g19300 | GATL1     | putative galacturonosyltransferase       | 5.97                      | 7.94                      | -1.97                              | 7.01                       | -1.04                               | GATGGCGATGCAAAAGAGAATGA    | CAATAAAAACGGTGGTAAACGAAC    |
| At3g62660 | GATL7     | putative galacturonosyltransferase       | 7.95                      | 6.76                      | 1.19                               | 6.76                       | 1.19                                | GCCGTTCTGTTGGTGTTCG        | CACCGATGCTCTATCGGAGC        |
| At1g24170 | GATL8     | putative galacturonosyltransferase       | 5.55                      | 6.97                      | -1.42                              | 5.92                       | -0.37                               | TTTGGTGTGCGGGTAATG         | TCTAAACCATGTTGGTTCCATC      |
| At3g53190 | PecL      | pectatelyase family protein              | 4.34                      | 7.77                      | -3.43                              | 7.25                       | -2.91                               | AATCCGCCTCATTATCACC        | CTGCCACCAACGCCAAG           |
| At5g53370 | PME       | pectinesterase family protein            | 4.23                      | 5.82                      | -1.59                              | 3.79                       | 0.44                                | TGGGAAAAGTATCGCCGATG       | ACCAGTCGACGAAAAGTG          |
| At2g47550 | PME       | pectinesterase family protein            | 8.03                      | 5.57                      | 2.46                               | 5.72                       | 2.31                                | TTTTCTCAAAGGTTGGTGC        | GCTTGTGGTGGCAATCG           |
| At4g38420 | PME       | pectinesterase family protein, SKS9      | 6.11                      | 4.13                      | 1.98                               | 5.72                       | 0.39                                | CGCTCCACCACTCAGGTATATCC    | CATTGTCCAGTGCCACATATACG     |

|                  |               |                                                        |       |       |       |       |       |                           |                          |
|------------------|---------------|--------------------------------------------------------|-------|-------|-------|-------|-------|---------------------------|--------------------------|
| <i>At5g48450</i> | <i>PME</i>    | pectinmethylesterase                                   | 6.54  | 7.65  | -1.11 | 7.34  | -0.80 | GCACATACAACAAGGGTGATGC    | CATGCACCAGGAAACACCTG     |
| <i>At5g45280</i> | <i>PAE</i>    | Pectinacetylerase, putative                            | 11.15 | 10.12 | 1.03  | 9.67  | 1.48  | GCTTCAAACCGTTCAAGAGACC    | TCGTGCGGATCGAACA         |
| <i>At4g19410</i> | <i>PAE</i>    | pectinacetylerase, putative                            | 2.24  | 5.25  | -3.01 | 4.17  | -1.93 | GCCTCTTGGTCCGGTGACAA      | CGACTGCTTTCGCAATTCTCG    |
| <i>At2g06850</i> | <i>XTH4</i>   | endoxyloglucan transferase (EXGT-A1) gene              | 1.87  | 7.02  | -5.15 | 3.91  | -2.04 | CCCAACTTGGGCTTTTGACC      | GTGCCAGTGTATTTGTGCGAGGA  |
| <i>At4g03210</i> | <i>XTH9</i>   | xyloglucan endotransglucosylase/hydrolases             | 2.87  | 6.85  | -3.98 | 5.46  | -2.59 | TCATTGTGTCAACGAAGGCG      | TTGATTCAAACCCAGCTCCAG    |
| <i>At4g30290</i> | <i>XTH19</i>  | putat. xyloglucan endotransglycosylase/hydrolase       | 5.24  | 5.85  | -0.61 | 4.93  | 0.31  | TTTTTACCGTTGATGGGATTCCA   | ATGGGACTCCACGTGACTCG     |
| <i>At4g25810</i> | <i>XTH23</i>  | xyloglucan endotransglycosylase-related protein        | 4.05  | 1.54  | 2.51  | 0.87  | 3.18  | COGCTTACTATTTGAAATCCCCT   | AAGGATCACCCTTAGGTTTCCC   |
| <i>At5g53250</i> | <i>AGP22</i>  | arabinogalactan protein 22                             | 5.03  | 9.72  | -4.69 | 7.73  | -2.70 | CATCTCCGTGATTCTTTTGCC     | ATCGATGTTCCATCGCTGG      |
| <i>At1g35230</i> | <i>AGP5</i>   | encodes arabinogalactan-protein                        | 6.93  | 5.05  | 1.88  | 4.23  | 2.70  | CATCTCCGTGATTCTTTTGCC     | ATCGATGTTCCATCGCTGG      |
| <i>At5g07570</i> | <i>HRGP</i>   | glycine/proline-rich protein                           | 12.96 | 13.53 | -0.57 | 10.72 | 2.24  | CGTCTACTTCCCCATCCGGA      | GCAGGTCCAGCTTCTCCAGA     |
| <i>At1g76930</i> | <i>HRGP</i>   | encodes an Arabidopsis extensin gene                   | -1.01 | -2.46 | 1.45  | -2.92 | 1.91  | TCGATGTATCCCCCTTGGTAA     | CCTGGACTGATACCGGATGAATA  |
| <i>At3g50570</i> | <i>HRGP</i>   | hydroxyproline-rich glycoprotein family protein;       | 6.48  | 7.4   | -0.92 | 4.61  | 1.87  | TGGAGTCGACGACGATACACA     | TTCTCCCGTCAACGATCTTGT    |
| <i>At1g05570</i> | <i>CALS1</i>  | encodes a callose synthase 1 catalytic subunit         | 5.57  | 6.55  | -0.98 | 6.47  | -0.90 | TCCCGGCTCGTCCCTAATA       | GTTGGGAAACGGGATGTTTG     |
| <i>At4g04970</i> | <i>GSL1</i>   | encodes a gene similar to callose synthase             | 8.4   | 9.22  | -0.82 | 9.54  | -1.14 | TTCTGGCTTCGATTGGCTCA      | CCATAGCCATGCAATGAAATCA   |
| <i>At2g30490</i> | <i>C4H</i>    | encodes a cinnamate-4-hydroxylase                      | 2.18  | 0.79  | 1.39  | 0.94  | 1.24  | TCGCCGCGATTGAGACAAC       | GCTCTGCAATTCCCCACTCG     |
| <i>At1g51680</i> | <i>4CL1</i>   | encodes an isoform of 4-coumarate:CoA ligase           | 3.39  | 1.77  | 1.62  | 2.10  | 1.29  | TACTGATGTTGCTGTTGTGCGCAAT | GGAACCTCACCAGCTGCTTCTTCT |
| <i>At3g21240</i> | <i>4CL2</i>   | encodes an isoform of 4-coumarate:CoA ligase           | 5.18  | 3.36  | 1.82  | 3.64  | 1.54  | TGCTAAGTTTCTAACGCCAAGC    | GCTTCTGTATCCCATAGCCCT    |
| <i>At1g65060</i> | <i>4CL3</i>   | encodes an isoform of 4-coumarate:CoA ligase           | 7.67  | 10.08 | -2.41 | 10.38 | -2.71 | CAAGATAGTCTTCGTCGCCGT     | CCGTATACCATATCCCTGGC     |
| <i>At5g04330</i> | <i>F5H</i>    | ferulate-5-hydroxylase, putative                       | 8.05  | 8.54  | -0.49 | 9.08  | -1.03 | CATGGATGTGATGTTCCGGAGG    | GGTTAGCACCCATTGCGATTGC   |
| <i>At5g48930</i> | <i>HCT</i>    | hydroxycinnamoyltransferase                            | 3.62  | 2.87  | 0.75  | 3.10  | 0.52  | TTCCCGAAGTTGATCACTCCG     | GTCACCTGCAAAACGAGAAGC    |
| <i>At1g15950</i> | <i>CCR1</i>   | cinnamoyl CoA reductase isoform                        | 3.66  | 3.63  | 0.03  | 3.81  | -0.15 | GACCCTGAGGCTGTGCTTGA      | GCCGTAACAATACCAATTCTTGTT |
| <i>At1g80820</i> | <i>CCR2</i>   | cinnamoyl CoA reductase isoform                        | 11.52 | 7.79  | 3.73  | 9.11  | 2.41  | GAGGTTGTTGAGATTCTGGCCA    | TTCTCGTCCGAACACTTGGTG    |
| <i>At5g54160</i> | <i>COMT1</i>  | caffeic acid/5-hydroxyferulic acid O-methyltransferase | 2.10  | 1.82  | 0.28  | 1.70  | 0.40  | ATCTCCACATGTCATCGAAGA     | TCTCCTCAACATGCTCAATACC   |
| <i>At3g19450</i> | <i>CAD4</i>   | cinnamyl alcohol dehydrogenase isoform                 | 4.55  | 5.64  | -1.09 | 5.28  | -0.73 | ATCCTATGGTTCCTGGGCACGA    | TCTCCTACGGTGAACCTGCTCACA |
| <i>At4g39330</i> | <i>CAD9</i>   | dehydrogenase of unknown function                      | 2.74  | 8.55  | -5.81 | 6.85  | -4.11 | TGTTCTCGGAAGGAAAATGGTTG   | CTCTTGTGTCTCCTTCATCCCTCC |
| <i>At5g24780</i> | <i>VSP1</i>   | acid phosphatase                                       | 7.37  | 5.57  | 1.80  | 6.60  | 0.77  | CACTGTGCGAATCTCAAGGCTG    | CGTTTGGCTTGAGTATGAGATGC  |
| <i>At5g24770</i> | <i>VSP2</i>   | acid phosphatase                                       | 9.44  | 5.71  | 3.73  | 7.87  | 1.57  | ACGCAAAATATGGATACGGAACAG  | CGGTCCCTAACCAACACAGTA    |
| <i>At3g12500</i> | <i>CHI-B</i>  | basic chitinase                                        | 6.77  | 5.58  | 1.19  | 5.82  | 0.95  | ACGAGGAAGAAGGAGGTCGC      | CTGTAGCCCATCCACCTGTGATTT |
| <i>At5g44420</i> | <i>PDF1.2</i> | plant defensin                                         | 8.27  | 9.24  | -0.97 | 3.92  | 4.35  | TTTGCTGCTTTCGACGCAC       | CACTTGGCTTCTCGCAACT      |
| <i>At2g14610</i> | <i>PR1</i>    | Pathogenesis-related gene 1                            | 9.05  | 5.81  | 3.24  | 8.83  | 0.22  | CGTGCAATGGAGTTTGTGGTC     | TTTGGCACATCCGAGTCTCAC    |
| <i>At1g75040</i> | <i>PR5</i>    | Thaumatococcus-like protein                            | 8.3   | 6.54  | 1.76  | 8.04  | 0.26  | ACAGGCTGCAACTTTGACGC      | TTAGACCGCCACAGTCTCCG     |
| <i>At2g43570</i> | <i>CHI</i>    | chitinase, putative                                    | 9.71  | 7.63  | 2.08  | 9.32  | 0.39  | TTCATGGCCGAGCTAATTC       | CGATTTGCGGTTTGGAGATG     |

\* $\Delta C_T = C_T$  (gene of interest) -  $C_T$  (*UBQ10* reference gene).  $C_T$  = threshold cycle number.

\*\* $\Delta\Delta C_T = \Delta C_T$  (Control) -  $\Delta C_T$  (Thax A).

**Figure S1.** Aniline blue staining of *Arabidopsis* seedlings treated with thaxtomin A or isoxaben.

Deposition of ectopic callose was analyzed in the elongation zones of hypocotyls (A-C) or roots (D-F) of 6-days-old, liquid culture grown, etiolated *Arabidopsis* seedlings treated with 200 nM thaxtomin A during two days (A, D), methanol-treated control seedlings (B, E) or seedlings treated with 5 nM isoxaben (C, F). Typical staining patterns are shown. Arrow heads in panel A point towards ectopic callose deposition in thaxtomin A-treated hypocotyls. Conductive tissue in all conditions including untreated (not shown) or methanol-treated (B, E) seedlings showed autofluorescence.

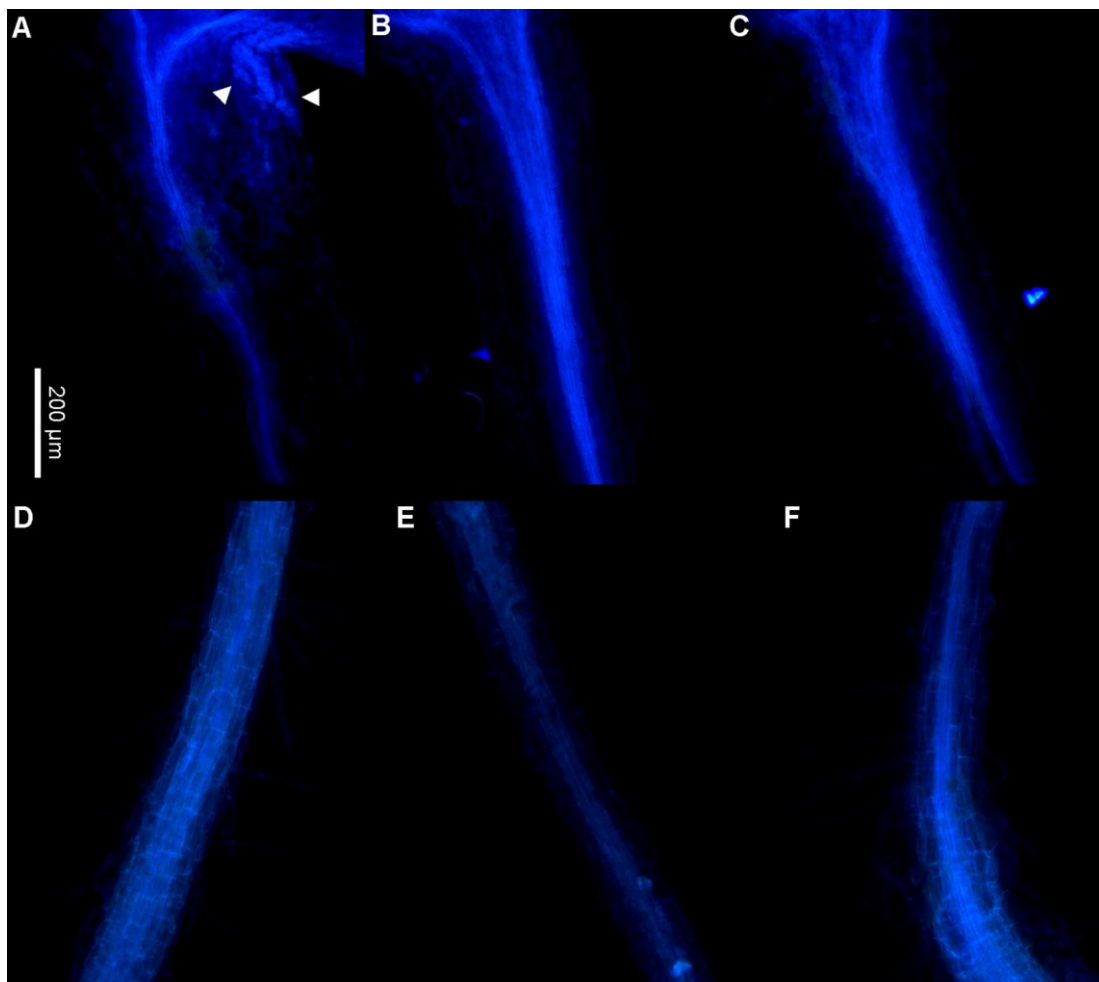

**Figure S2.** Effect of thaxtomin A on GFP-TUA6-labeled cortical microtubules.

Microtubules were analyzed in etiolated *A. thaliana* hypocotyl cells as shown in Figure 4A.

Representative snap-shots (four-frame-averaged) of untreated (A-C) and 200 nM Thaxtomin

A treated (D-F) wild-type seedlings are presented.

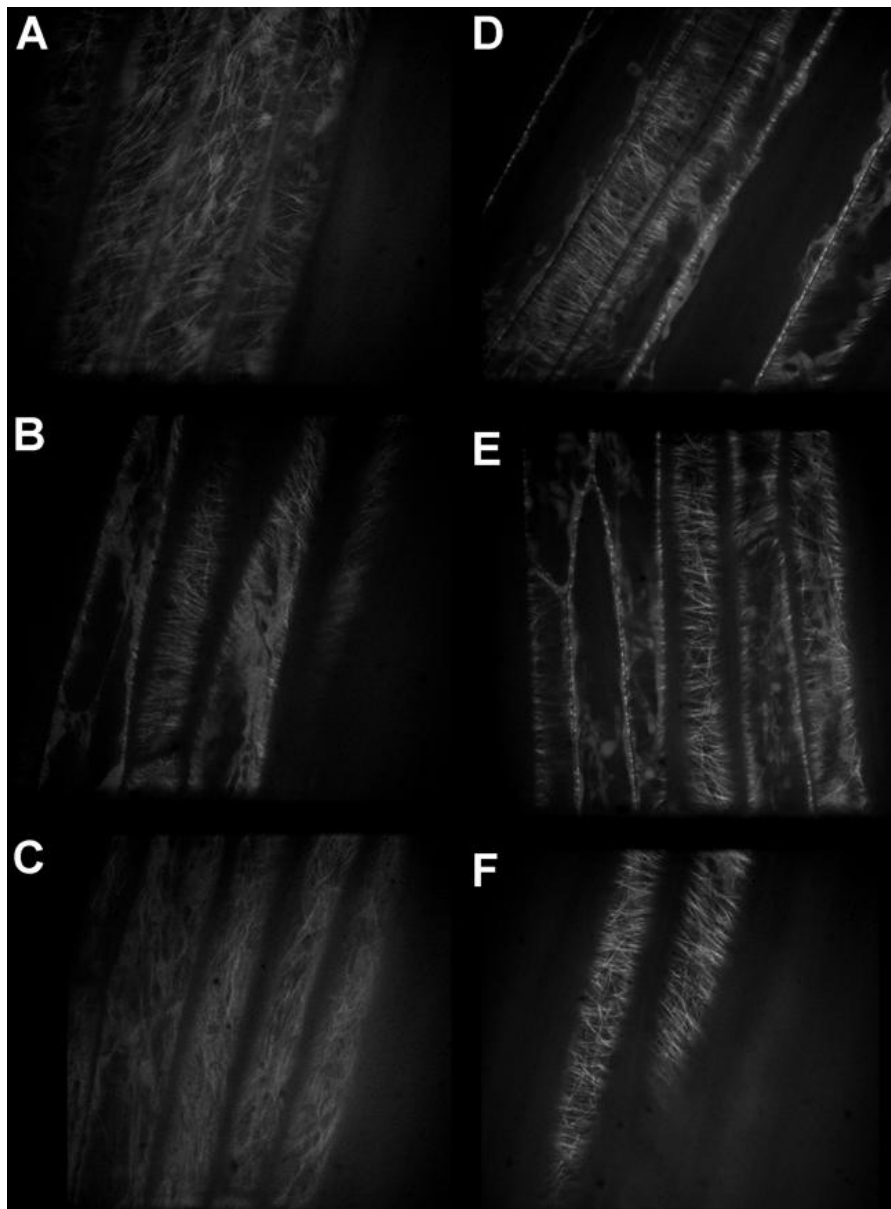

Supplement: ern344_1.pdf [file ern344_1.pdf]
